# Supplementary material for: HMGA1 promotes breast cancer angiogenesis supporting the stability, nuclear localization and transcriptional activity of FOXM1
Source: PubMed Central journal article supplement (PMC6636010; doi:10.1186/s13046-019-1307-8), 2019-07-16
Supplement: 13046_2019_1307_MOESM1_ESM.pdf [file 13046_2019_1307_MOESM1_ESM.pdf]

**Additional file 1: Table S1.**

| <b>Target gene/<br/>primer name</b>      | <b>Forward primer (5'- 3')</b> | <b>Reverse Primer (5'- 3')</b> |
|------------------------------------------|--------------------------------|--------------------------------|
| hGAPDH                                   | TCTCTGCTCCTCCTGTTC             | GCCCAATACGACCAAATCC            |
| hHMGA1                                   | ACCAGCGCCAAATGTTTCATCCTCA      | AGCCCCTCTTCCCCACAAAGAGT        |
| hFOXM1                                   | AGAAACGACCGAATCCAGAGC          | CTGACCCGTGGTAGCAGTG            |
| hVEGFA                                   | AGGAGGGCAGAATCATCACG           | ACCAGGGTCTCGATTGGATG           |
| hCCNE2                                   | TGAGCCGAGCGGTAGCTGGT           | GGGCTGGGGCTGCTGCTTAG           |
| hLEF1                                    | CGAATGTCGTTGCTGAGTGT           | GCTGTCTTTCTTTCCGTGCT           |
| zVEGFA<br>(Zebrafish VEGFA)              | GATGTGATTCCCTTCATGGATGTGT      | GGATACTCCTGGATGATGTCTACCA      |
| zFLT-1<br>(Zebrafish VEGF<br>receptor 1) | AACTCACAGACCAGTGAACAAGATC      | GCCCTGTAACGTGTGCACTAAA         |
| zFLK-1<br>(Zebrafish VEGF<br>receptor 2) | GACCATAAAACAAGTGAGGCAGAAG      | CTCCTGGTTTGACAGAGCGATA         |
| zACTIN<br>(Zebrafish actin)              | CAGCAAGCAGGAGTACGATGAGT        | TTGAATCTCATTGCTAGGCCATT        |
| hKi67<br>(human Ki67)                    | GCCTGCTCGACCCTACAGA            | GCTTGTCAACTGCGGTTGC            |
| hGAPDH<br>(human GAPDH)                  | CCCATCACCATCTTCCAGGAG          | CTTCTCCATGGTGGTGAAGACG         |
