# Supplementary material for: HMGA1 promotes breast cancer angiogenesis supporting the stability, nuclear localization and transcriptional activity of FOXM1
Source: PubMed Central journal article supplement (PMC6636010; doi:10.1186/s13046-019-1307-8), 2019-07-16

**Additional file 5: Figure S2.**

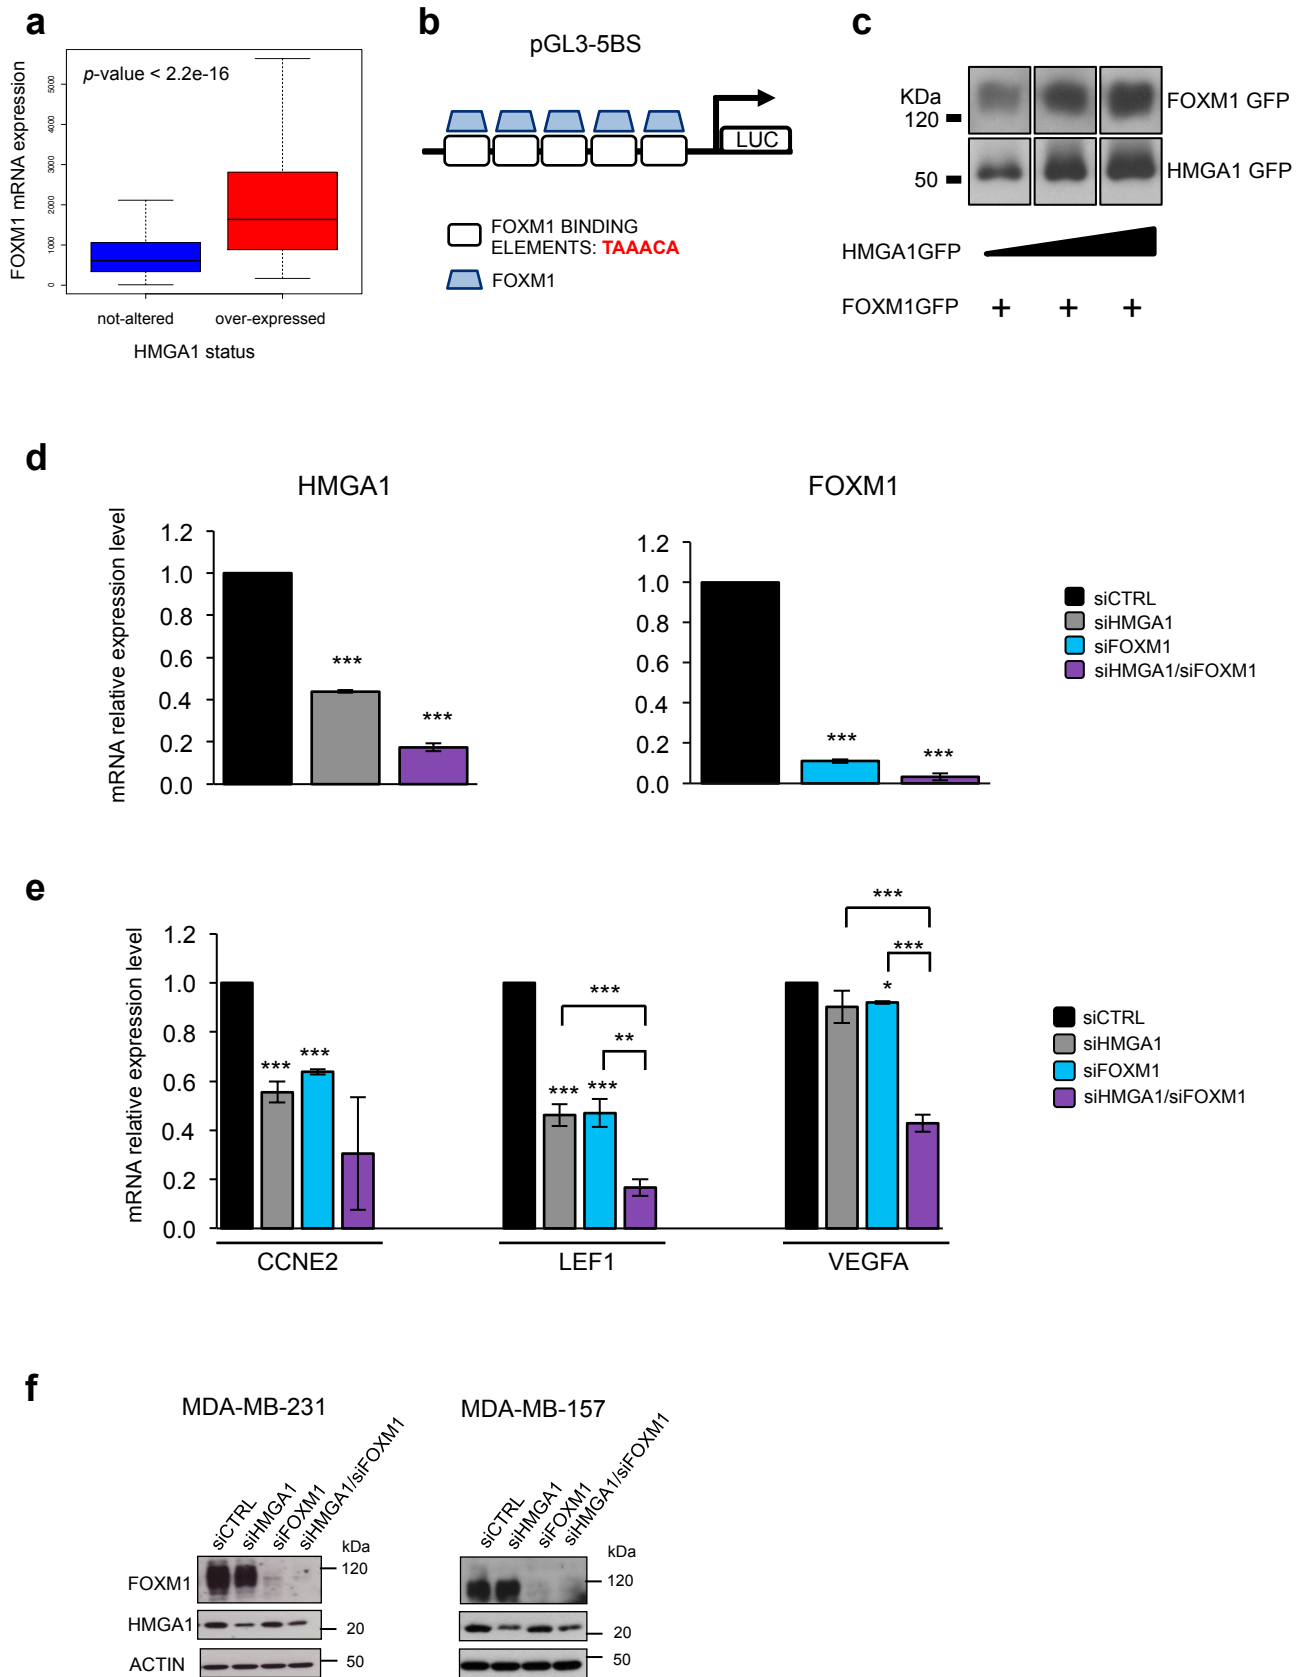

Supplement: 13046_2019_1307_MOESM5_ESM.pdf [file 13046_2019_1307_MOESM5_ESM.pdf]
