# Supplementary material for: HMGA1 promotes breast cancer angiogenesis supporting the stability, nuclear localization and transcriptional activity of FOXM1
Source: Springer Nature journal article supplement (doi:10.1186/s13046-019-1307-8), 2019-07-16
Supplement: MOESM3 [file 16937840]

### Additional file 3: Table S2.

| Gene Set Name                                                                                                     | Description                                                                                                                | FDR q-value |
|-------------------------------------------------------------------------------------------------------------------|----------------------------------------------------------------------------------------------------------------------------|-------------|
| REACTOME_METABOLISM_OF_RNA                                                                                        | Genes involved in Metabolism of RNA                                                                                        | 5.5E-51     |
| KEGG_RIBOSOME                                                                                                     | Ribosome                                                                                                                   | 5.61E-51    |
| REACTOME_METABOLISM_OF_MRNA                                                                                       | Genes involved in Metabolism of mRNA                                                                                       | 2.21E-48    |
| REACTOME_TRANSLATION                                                                                              | Genes involved in Translation                                                                                              | 4.15E-42    |
| REACTOME_3_UTR_MEDIATED_TRANSLATIONAL_REGULATION                                                                  | Genes involved in 3' -UTR-mediated translational regulation                                                                | 4.68E-42    |
| REACTOME_METABOLISM_OF_PROTEINS                                                                                   | Genes involved in Metabolism of proteins                                                                                   | 4.68E-42    |
| REACTOME_INFLUENZA_LIFE_CYCLE                                                                                     | Genes involved in Influenza Life Cycle                                                                                     | 2.02E-40    |
| REACTOME_PEPTIDE_CHAIN_ELONGATION                                                                                 | Genes involved in Peptide chain elongation                                                                                 | 1.11E-38    |
| REACTOME_NONSENSE_MEDIATED_DECAY_ENHANCED_BY_THE_EXON_JUNCTION_COMPLEX                                            | Genes involved in Nonsense Mediated Decay Enhanced by the Exon Junction Complex                                            | 1.17E-38    |
| REACTOME_INFLUENZA_VIRAL_RNA_TRANSCRIPTION_AND_REPLICATION                                                        | Genes involved in Influenza Viral RNA Transcription and Replication                                                        | 1.36E-38    |
| REACTOME_SRP_DEPENDENT_COTRANSLATIONAL_PROTEIN_TARGETING_TO_MEMBRANE                                              | Genes involved in SRP-dependent cotranslational protein targeting to membrane                                              | 5.85E-36    |
| REACTOME_IMMUNE_SYSTEM                                                                                            | Genes involved in Immune System                                                                                            | 1.26E-33    |
| HALLMARK_OXIDATIVE_PHOSPHORYLATION                                                                                | Genes encoding proteins involved in oxidative phosphorylation.                                                             | 6.2E-27     |
| REACTOME_ADAPTIVE_IMMUNE_SYSTEM                                                                                   | Genes involved in Adaptive Immune System                                                                                   | 4.25E-25    |
| REACTOME_FORMATION_OF_THE_TERNARY_COMPLEX_AND_SUBSEQUENTLY_THE_43S_COMPLEX                                        | Genes involved in Formation of the ternary complex, and subsequently, the 43S complex                                      | 3.52E-24    |
| REACTOME_ACTIVATION_OF_THE_MRNA_UPON_BINDING_OF_THE_CAP_BINDING_COMPLEX_AND_EIFs_AND_SUBSEQUENT_BINDING_TO_43S    | Genes involved in Activation of the mRNA upon binding of the cap-binding complex and eIFs, and subsequent binding to 43S   | 1.53E-23    |
| REACTOME_HIV_INFECTION                                                                                            | Genes involved in HIV Infection                                                                                            | 2.18E-23    |
| HALLMARK_MYC_TARGETS_V1                                                                                           | A subgroup of genes regulated by MYC - version 1 (v1).                                                                     | 4.16E-23    |
| HALLMARK_MTORC1_SIGNALING                                                                                         | Genes up-regulated through activation of mTORC1 complex.                                                                   | 3.19E-21    |
| REACTOME_DNA_REPLICATION                                                                                          | Genes involved in DNA Replication                                                                                          | 3.79E-19    |
| REACTOME_HOST_INTERACTIONS_OF_HIV_FACTORS                                                                         | Genes involved in Host Interactions of HIV factors                                                                         | 3.94E-19    |
| REACTOME_CELL_CYCLE_MITOTIC                                                                                       | Genes involved in Cell Cycle, Mitotic                                                                                      | 4.27E-19    |
| KEGG_HUNTINGTONS_DISEASE                                                                                          | Huntington's disease                                                                                                       | 6.92E-19    |
| HALLMARK_P53_PATHWAY                                                                                              | Genes involved in p53 pathways and networks.                                                                               | 1.14E-17    |
| KEGG_ALZHEIMERS_DISEASE                                                                                           | Alzheimer's disease                                                                                                        | 1.59E-17    |
| REACTOME_MITOTIC_M_M_G1_PHASES                                                                                    | Genes involved in Mitotic M-M/G1 phases                                                                                    | 2.78E-17    |
| KEGG_PARKINSONS_DISEASE                                                                                           | Parkinson's disease                                                                                                        | 4.26E-17    |
| REACTOME_CELL_CYCLE                                                                                               | Genes involved in Cell Cycle                                                                                               | 4.53E-17    |
| REACTOME_CELL_CYCLE_CHECKPOINTS                                                                                   | Genes involved in Cell Cycle Checkpoints                                                                                   | 4.74E-16    |
| REACTOME_DOWNSTREAM_SIGNALING_EVENTS_OF_B_CELL_RECEPTOR_BCR                                                       | Genes involved in Downstream Signaling Events Of B Cell Receptor (BCR)                                                     | 6.77E-15    |
| REACTOME_APOPTOSIS                                                                                                | Genes involved in Apoptosis                                                                                                | 8.43E-15    |
| REACTOME_APC_C_CDC20_MEDIATED_DEGRADATION_OF_MITOTIC_PROTEINS                                                     | Genes involved in APC/C:Cdc20 mediated degradation of mitotic proteins                                                     | 1.09E-14    |
| HALLMARK_DNA_REPAIR                                                                                               | Genes involved in DNA repair.                                                                                              | 1.17E-14    |
| REACTOME_TCA_CYCLE_AND_RESPIRATORY_ELECTRON_TRANSPORT                                                             | Genes involved in The citric acid (TCA) cycle and respiratory electron transport                                           | 1.61E-14    |
| REACTOME_METABOLISM_OF_AMINO_ACIDS_AND_DERIVATIVES                                                                | Genes involved in Metabolism of amino acids and derivatives                                                                | 2.11E-14    |
| REACTOME_CLASS_I_MHC_MEDIATED_ANTIGEN_PROCESSING_PRESENTATION                                                     | Genes involved in Class I MHC mediated antigen processing & presentation                                                   | 2.12E-14    |
| REACTOME_REGULATION_OF_MITOTIC_CELL_CYCLE                                                                         | Genes involved in Regulation of mitotic cell cycle                                                                         | 2.77E-14    |
| KEGG_OXIDATIVE_PHOSPHORYLATION                                                                                    | Oxidative phosphorylation                                                                                                  | 3.69E-14    |
| REACTOME_APC_C_CDH1_MEDIATED_DEGRADATION_OF_CDC20_AND_OTHER_APC_C_CDH1_TARGETED_PROTEINS_IN_LATE_MITOSIS_EARLY_G1 | Genes involved in APC/C:Cdh1 mediated degradation of Cdc20 and other APC/C:Cdh1 targeted proteins in late mitosis/early G1 | 8.91E-14    |
| REACTOME_SYNTHESIS_OF_DNA                                                                                         | Genes involved in Synthesis of DNA                                                                                         | 1.7E-13     |
| HALLMARK_UNFOLDED_PROTEIN_RESPONSE                                                                                | Genes up-regulated during unfolded protein response, a cellular stress response related to the endoplasmic reticulum.      | 2.37E-13    |
| REACTOME_METABOLISM_OF_CARBOHYDRATES                                                                              | Genes involved in Metabolism of carbohydrates                                                                              | 3.54E-13    |
| REACTOME_SIGNALING_BY_THE_B_CELL_RECEPTOR_BCR                                                                     | Genes involved in Signaling by the B Cell Receptor (BCR)                                                                   | 3.89E-13    |
| REACTOME_MITOTIC_G1_G1_S_PHASES                                                                                   | Genes involved in Mitotic G1-G1/S phases                                                                                   | 3.91E-13    |
| PID_P73PATHWAY                                                                                                    | p73 transcription factor network                                                                                           | 6.02E-13    |
| REACTOME_ANTIGEN_PROCESSING_UBIQUITINATION_PROTEASOME_DEGRADATION                                                 | Genes involved in Antigen processing: Ubiquitination & Proteasome degradation                                              | 6.02E-13    |
| REACTOME_S_PHASE                                                                                                  | Genes involved in S Phase                                                                                                  | 8.00E-13    |
| REACTOME_REGULATION_OF_APOPTOSIS                                                                                  | Genes involved in Regulation of Apoptosis                                                                                  | 2.11E-12    |
| REACTOME_ANTIGEN_PROCESSING_CROSS_PRESENTATION                                                                    | Genes involved in Antigen processing-Cross presentation                                                                    | 2.87E-12    |
| HALLMARK_E2F_TARGETS                                                                                              | Genes encoding cell cycle related targets of E2F transcription factors.                                                    | 3.81E-12    |

**Table S3.**

| Gene Set Name                                       | Description                                                                                                               | FDR q-value |
|-----------------------------------------------------|---------------------------------------------------------------------------------------------------------------------------|-------------|
| HALLMARK_E2F_TARGETS                                | Genes encoding cell cycle related targets of E2F transcription factors.                                                   | 8.05E-87    |
| HALLMARK_G2M_CHECKPOINT                             | Genes involved in the G2/M checkpoint, as in progression through the cell division cycle.                                 | 6.58E-72    |
| REACTOME_CELL_CYCLE                                 | Genes involved in Cell Cycle                                                                                              | 1.3E-48     |
| REACTOME_CELL_CYCLE_MITOTIC                         | Genes involved in Cell Cycle, Mitotic                                                                                     | 1.33E-48    |
| REACTOME_DNA_REPLICATION                            | Genes involved in DNA Replication                                                                                         | 1.25E-37    |
| REACTOME_MITOTIC_M_M_G1_PHASES                      | Genes involved in Mitotic M-M/G1 phases                                                                                   | 4.15E-29    |
| HALLMARK_TNFA_SIGNALING_VIA_NFKB                    | Genes regulated by NF-kB in response to TNF [GeneID=7124].                                                                | 1.89E-28    |
| KEGG_CELL_CYCLE                                     | Cell cycle                                                                                                                | 3.17E-24    |
| HALLMARK_EPITHELIAL_MESENCHYMAL_TRANSITION          | Genes defining epithelial-mesenchymal transition, as in wound healing, fibrosis and metastasis.                           | 7.54E-24    |
| HALLMARK_ESTROGEN_RESPONSE_EARLY                    | Genes defining early response to estrogen.                                                                                | 4.99E-23    |
| HALLMARK_MITOTIC_SPINDLE                            | Genes important for mitotic spindle assembly.                                                                             | 4.99E-23    |
| NABA_MATRISOME                                      | Ensemble of genes encoding extracellular matrix and extracellular matrix-associated proteins                              | 6.49E-23    |
| HALLMARK_GLYCOLYSIS                                 | Genes encoding proteins involved in glycolysis and gluconeogenesis.                                                       | 3.33E-22    |
| REACTOME_MITOTIC_G1_G1_S_PHASES                     | Genes involved in Mitotic G1-G1/S phases                                                                                  | 3.99E-21    |
| HALLMARK_ESTROGEN_RESPONSE_LATE                     | Genes defining late response to estrogen.                                                                                 | 1.54E-20    |
| HALLMARK_MYC_TARGETS_V1                             | A subgroup of genes regulated by MYC - version 1 (v1).                                                                    | 1.54E-20    |
| REACTOME_IMMUNE_SYSTEM                              | Genes involved in Immune System                                                                                           | 6.24E-20    |
| PID_E2F_PATHWAY                                     | E2F transcription factor network                                                                                          | 2.48E-19    |
| REACTOME_MITOTIC_PROMETAPHASE                       | Genes involved in Mitotic Prometaphase                                                                                    | 3.7E-18     |
| HALLMARK_HYPOXIA                                    | Genes up-regulated in response to low oxygen levels (hypoxia).                                                            | 4.12E-18    |
| HALLMARK_P53_PATHWAY                                | Genes involved in p53 pathways and networks.                                                                              | 4.12E-18    |
| REACTOME_DNA_STRAND_ELONGATION                      | Genes involved in DNA strand elongation                                                                                   | 1.07E-17    |
| REACTOME_G1_S_TRANSITION                            | Genes involved in G1/S Transition                                                                                         | 1.1E-17     |
| REACTOME_S_PHASE                                    | Genes involved in S Phase                                                                                                 | 4.18E-17    |
| HALLMARK_APOPTOSIS                                  | Genes mediating programmed cell death (apoptosis) by activation of caspases.                                              | 8.92E-17    |
| NABA_MATRISOME_ASSOCIATED                           | Ensemble of genes encoding ECM-associated proteins including ECM-affiliated proteins, ECM regulators and secreted factors | 1.48E-16    |
| PID_FOXM1_PATHWAY                                   | FOXM1 transcription factor network                                                                                        | 6.28E-16    |
| REACTOME_DNA_REPAIR                                 | Genes involved in DNA Repair                                                                                              | 8.22E-16    |
| HALLMARK_INFLAMMATORY_RESPONSE                      | Genes defining inflammatory response.                                                                                     | 4.71E-15    |
| HALLMARK_KRAS_SIGNALING_UP                          | Genes up-regulated by KRAS activation.                                                                                    | 4.71E-15    |
| PID_P53_DOWNSTREAM_PATHWAY                          | Direct p53 effectors                                                                                                      | 6.47E-15    |
| PID_AURORA_B_PATHWAY                                | Aurora B signaling                                                                                                        | 6.47E-15    |
| PID_PLK1_PATHWAY                                    | PLK1 signaling events                                                                                                     | 1.65E-14    |
| KEGG_PATHWAYS_IN_CANCER                             | Pathways in cancer                                                                                                        | 1.85E-14    |
| HALLMARK_IL2_STATS_SIGNALING                        | Genes up-regulated by STAT5 in response to IL2 stimulation.                                                               | 2.31E-14    |
| HALLMARK_MTORC1_SIGNALING                           | Genes up-regulated through activation of mTORC1 complex.                                                                  | 2.31E-14    |
| REACTOME_SYNTHESIS_OF_DNA                           | Genes involved in Synthesis of DNA                                                                                        | 1.39E-13    |
| REACTOME_E2F_MEDIATED_REGULATION_OF_DNA_REPLICATION | Genes involved in E2F mediated regulation of DNA replication                                                              | 2.32E-13    |
| HALLMARK_UV_RESPONSE_DN                             | Genes down-regulated in response to ultraviolet (UV) radiation.                                                           | 1.19E-12    |
| REACTOME_G2_M_CHECKPOINTS                           | Genes involved in G2/M Checkpoints                                                                                        | 2.39E-12    |
| REACTOME_UNWINDING_OF_DNA                           | Genes involved in Unwinding of DNA                                                                                        | 5.13E-12    |
| KEGG_DNA_REPLICATION                                | DNA replication                                                                                                           | 7.62E-12    |
| REACTOME_ACTIVATION_OF_THE_PRE_REPLICATIVE_COMPLEX  | Genes involved in Activation of the pre-replicative complex                                                               | 8.74E-12    |
| KEGG_OOCYTE_MEIOSIS                                 | Oocyte meiosis                                                                                                            | 2.91E-11    |
| REACTOME_CELL_CYCLE_CHECKPOINTS                     | Genes involved in Cell Cycle Checkpoints                                                                                  | 3.42E-11    |
| REACTOME_DOUBLE_STRAND_BREAK_REPAIR                 | Genes involved in Double-Strand Break Repair                                                                              | 4.9E-11     |
| HALLMARK_COMPLEMENT                                 | Genes encoding components of the complement system, which is part of the innate immune system.                            | 7.72E-11    |
| REACTOME_CHROMOSOME_MAINTENANCE                     | Genes involved in Chromosome Maintenance                                                                                  | 1.41E-10    |
| PID_P73PATHWAY                                      | p73 transcription factor network                                                                                          | 1.69E-10    |
| PID_RB_1PATHWAY                                     | Regulation of retinoblastoma protein                                                                                      | 2.64E-10    |
