# Supplementary material for: HMGA1 promotes breast cancer angiogenesis supporting the stability, nuclear localization and transcriptional activity of FOXM1
Source: Springer Nature journal article supplement (doi:10.1186/s13046-019-1307-8), 2019-07-16
Supplement: MOESM4 [file 16937840]

**Additional file 4: Table S4.**

**a** 24 hours

| ID    | Exp Log Ratio |
|-------|---------------|
| CAV1  | 1.158         |
| CENPE | 0.801         |
| LEF1  | 0.758         |
| SNAI2 | 0.614         |
| CCNE2 | 0.587         |
| BRIP1 | 0.548         |
| CCNE1 | -0.661        |

**b** 72 hours

| ID     | Exp Log Ratio |
|--------|---------------|
| NES    | 1.457         |
| LEF1   | 1.183         |
| CCNE2  | 1.132         |
| AURKB  | 1.061         |
| CENPB  | 1.059         |
| TOP2A  | 0.909         |
| BRIP1  | 0.9           |
| MCM8   | 0.86          |
| SKP2   | 0.834         |
| CDK1   | 0.799         |
| CENPE  | 0.759         |
| CENPF  | 0.741         |
| CCNA2  | 0.74          |
| NEK2   | 0.627         |
| FOXM1  | 0.626         |
| ZEB1   | 0.547         |
| PLK4   | 0.525         |
| KIF20A | 0.513         |
| VEGFA  | 0.507         |
| LDHA   | 0.502         |
| CCND2  | -0.726        |
| AR     | -1.134        |
| VCAN   | -1.187        |
| MUC5AC | -1.35         |
