# Supplementary material for: HMGA1 promotes breast cancer angiogenesis supporting the stability, nuclear localization and transcriptional activity of FOXM1
Source: Springer Nature journal article supplement (doi:10.1186/s13046-019-1307-8), 2019-07-16

**Additional file 7: Figure S4.**

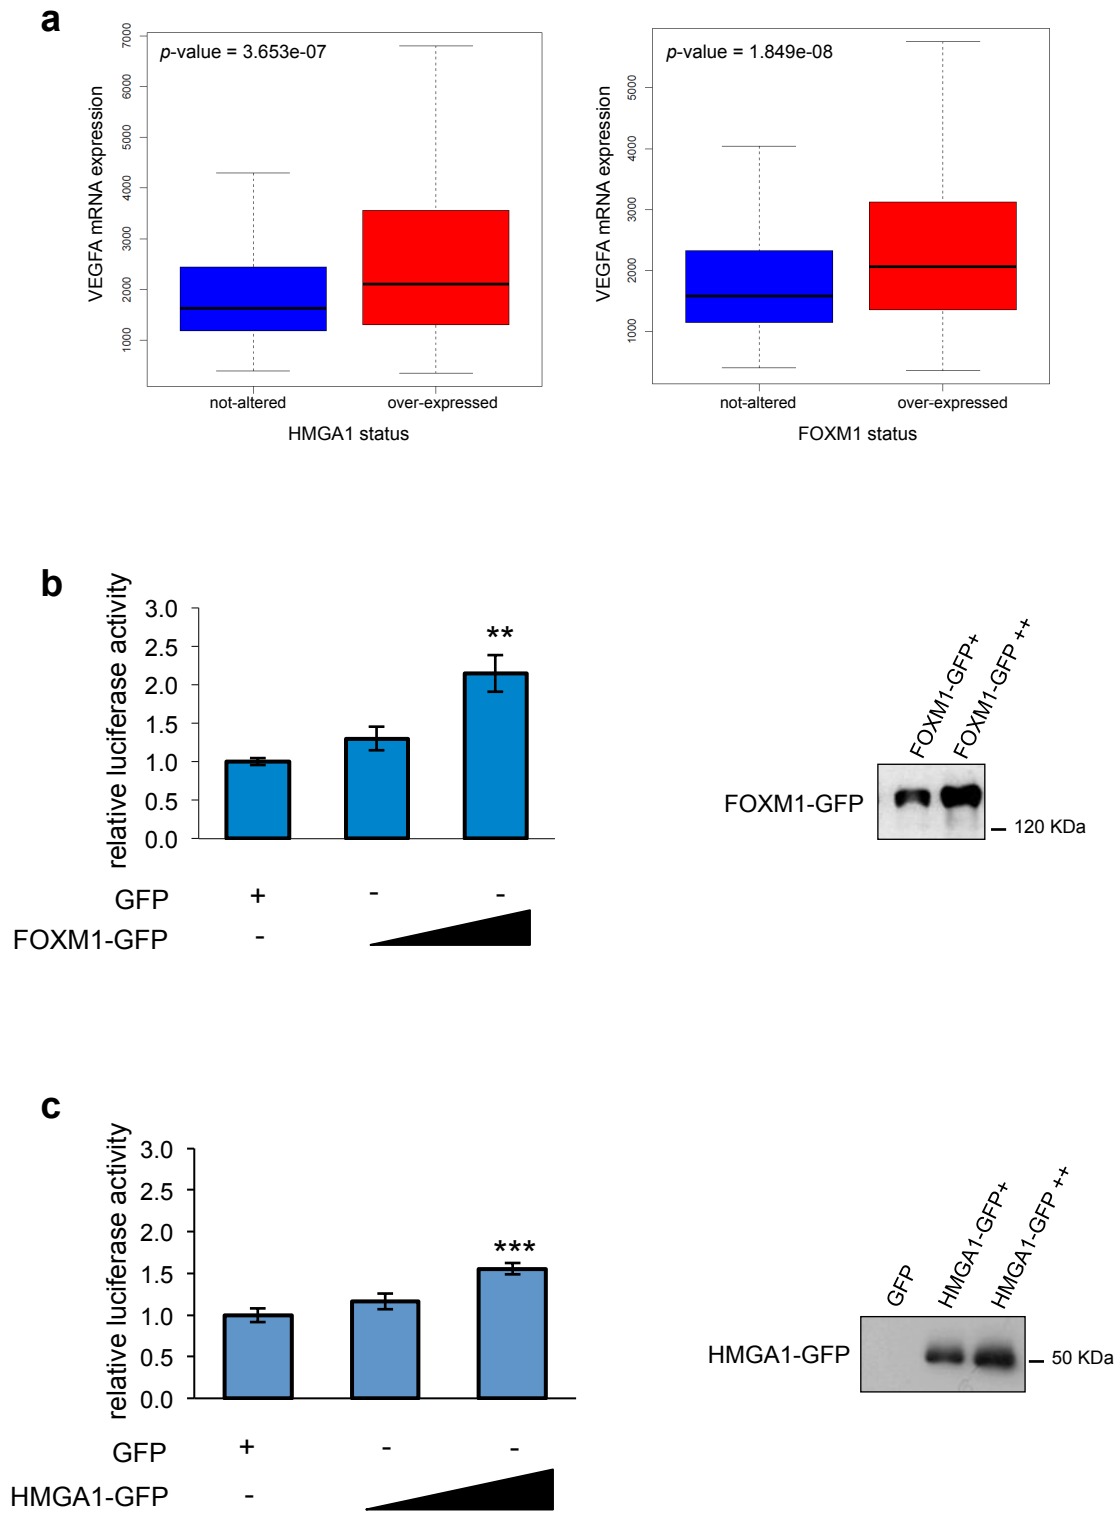

Supplement: MOESM7 [file 16937840]
